# Supplementary material for: Genomic and Physiological Characteristics of a Novel Nitrite-Oxidizing Nitrospira Strain Isolated From a Drinking Water Treatment Plant
Source: Front Microbiol. 2020 Sep 15;11:545190. doi: 10.3389/fmicb.2020.545190 (PMC7522533; doi:10.3389/fmicb.2020.545190)
Supplement: Supplementary file 3 [file Table_2.XLSX]

## Sheet: Table S2
Supplementary table S2 List of OTUs obtained in this study. The cloned sequences of 16S rRNA and amoA gene were grouped into an operational taxonomic unit (OTU) with similarity threshold of 98.7% and 98.5%, respectively.
OTU	Accession No.	Silva taxonomy	Close representative	Identity (%)	Obtained clone number	Relative abundance to total sequenced clones (%)*
		OTUs from the enrichment culture (16S rRNA gene)
1	LC521604	Bacteria;Nitrospirota;Nitrospiria;Nitrospirales;Nitrospiraceae;Nitrospira;	Nitrospira sp. strain GC86 (Y14644.1)	99.9**	35	40.2299
2	LC521605	Bacteria;Nitrospirota;Nitrospiria;Nitrospirales;Nitrospiraceae;Nitrospira;	Nitrospira japonica strain NJ1 (LT828648.1)	98	1	1.14943
3	LC521606	Bacteria;Proteobacteria;Gammaproteobacteria;Burkholderiales;Nitrosomonadaceae;Nitrosomonas;	Nitrosomonas sp. NP1 (LC126444.1)	99.6	2	2.29885
4	LC521607	Bacteria;Proteobacteria;Gammaproteobacteria;Burkholderiales;Nitrosomonadaceae;Nitrosomonas;	Nitrosomonas ureae strain Nm10 (CP013341.1)	98.5	2	2.29885
5	LC521608	Bacteria;Proteobacteria;Gammaproteobacteria;Burkholderiales;Nitrosomonadaceae;Nitrosomonas;	Nitrosomonas sp. Is79A3 (CP002876.1)	99.5	1	1.14943
6	LC521609	Bacteria;Proteobacteria;Gammaproteobacteria;Burkholderiales;Comamonadaceae;Acidovorax;	Acidovorax sp. YM3 (LC361243.1)	100	1	1.14943
7	LC521610	Bacteria;Proteobacteria;Alphaproteobacteria;Rickettsiales;SM2D12;	Alpha proteobacterium AKB-2008-KU10 (AM989074.1)	91.4	1	1.14943
8	LC521611	Bacteria;Bacteroidota;Bacteroidia;Cytophagales;Microscillaceae;OLB12;	Bacterium TG141 (AB308367.1)	94.2	1	1.14943
9	LC521612	Bacteria;Proteobacteria;Gammaproteobacteria;Burkholderiales;Alcaligenaceae;	Bordetella genomosp. 13 strain AU7206 (CP021111.1)	95.6	2	2.29885
10	LC521613	Bacteria;Bacteroidota;Bacteroidia;Chitinophagales;Saprospiraceae;uncultured;	Filamentous bacterium Plant1 Iso8 (DQ232754.1)	91.1	1	1.14943
11	LC521614	Bacteria;Bacteroidota;Bacteroidia;Flavobacteriales;Flavobacteriaceae;Flavobacterium;	Flavobacterium sp. strain R-12 (KU379662.1)	93.9	1	1.14943
12	LC521615	Bacteria;Chloroflexi;Chloroflexia;Chloroflexales;Herpetosiphonaceae;Herpetosiphon;	Herpetosiphon aurantiacus (NR_074236.1)	98.7	1	1.14943
13	LC521616	Bacteria;Proteobacteria;Alphaproteobacteria;Rhodospirillales;Magnetospirillaceae;Magnetospirillum;	Magnetospirillum sp. PM1331 (AB167721.2)	100	1	1.14943
14	LC521617	Bacteria;Bacteroidota;Bacteroidia;Chitinophagales;Chitinophagaceae;Edaphobaculum;	Nemorincola sp. strain Bacter-26 (MH671398.1)	97.6	5	5.74713
15	LC521618	Bacteria;Proteobacteria;Gammaproteobacteria;Burkholderiales;Oxalobacteraceae;Undibacterium;	Oxalobacteraceae bacterium AKB-2008-JO53 (AM989125.1)	99.2	3	3.44828
16	LC521619	Bacteria;Planctomycetota;Planctomycetes;Pirellulales;Pirellulaceae;Pir4 lineage;	Pirellula sp. (Schlesner 678) (X81947.1)	97.6	1	1.14943
17	LC521620	Bacteria;Proteobacteria;Gammaproteobacteria;Pseudomonadales;Pseudomonadaceae;Pseudomonas;	Pseudomonas mendocina strain PDS_PXH_19PXH (KY980683.1)	99.9	1	1.14943
18	LC521621	Bacteria;Actinobacteriota;Actinobacteria;Corynebacteriales;Nocardiaceae;Rhodococcus;	Rhodococcus sp. strain DMU2 (MN747134.1)	99.8	1	1.14943
19	LC521622	Bacteria;Proteobacteria;Gammaproteobacteria;Burkholderiales;Comamonadaceae;	Simplicispira sp. strain NY-02 (MH209627.1)	97.4	4	4.5977
20	LC521623	Bacteria;Proteobacteria;Gammaproteobacteria;Burkholderiales;Rhodocyclaceae;Sulfuritalea;	Sulfuritalea hydrogenivorans sk43H (AP012547.1)	97	1	1.14943
21	LC521624	Bacteria;Proteobacteria;Gammaproteobacteria;Xanthomonadales;Rhodanobacteraceae;	Tahibacter aquaticus strain STM85 (KY393070.1)	99.3	1	1.14943
22	LC521625	Bacteria;WPS-2;	Thermodesulfobium sp. strain 4bab (KY928404.1)	86	1	1.14943
23	LC521626	Bacteria;Acidobacteriota;Blastocatellia;11-24;	Unidentified bacterium clone M1_Rhizo_T7s_43 (EF605931.1)	94.8	1	1.14943
24	LC521627	Unclassified;	Acanthamoeba healyi strain CDC V013 (KU379662.1)	75.6	5	5.74713
25	LC521628	Unclassified;	Unidentified bacterium clone M1_Rhizo_T7s_43 (EF605931.1)	94.5	3	3.44828
26	LC521629	Unclassified;	Alpha proteobacterium SCGC AAA041-L04 (HQ663353.1)	90.7	2	2.29885
27	LC521630	Unclassified;	Alpha proteobacterium SCGC AAA160-C19 (JF488542.1)	89.4	2	2.29885
28	LC521631	Unclassified;	Alpha proteobacterium SCGC AAA160-C19 (JF488542.1)	86.2	1	1.14943
29	LC521632	Unclassified;	Armatimonas rosea strain YO-36 (NR_113009.1)	94.1	1	1.14943
30	LC521633	Unclassified;	Coxiella burnetii strain Heizberg (CP014561.1)	93.2	1	1.14943
31	LC521634	Unclassified;	Filamentous bacterium Plant1 Iso8 (DQ232754.1)	89.9	1	1.14943
32	LC521635	Unclassified;	Paludibacterium paludis strain KBP-21 (NR_134119.1)	89	1	1.14943
33	LC521636	Unclassified;	Uncultured bacterium clone FI-2F_D01 (EF220406.1)	84.2	1	1.14943
		OTUs from the enrichment culture (amoA gene)
45	LC521648		Candidatus Nitrospira nitrosa (CZQA01000001.1)	90.9	48
		OTUs from the isolated cultures growing in each well of the 96 wells microtiter plates (16S rRNA gene)
34	LC521637	Bacteria;Nitrospirota;Nitrospiria;Nitrospirales;Nitrospiraceae;Nitrospira;	Nitrospira japonica strain NJ1 (LT828648.1)	98	11
35	LC521638	Bacteria;Nitrospirota;Nitrospiria;Nitrospirales;Nitrospiraceae;Nitrospira;	Nitrospira japonica strain NJ1 (LT828648.1)	99.7	1
36	LC521639	Bacteria;Nitrospirota;Nitrospiria;Nitrospirales;Nitrospiraceae;Nitrospira;	Nitrospira sp. strain GC86 (Y14644.1)	99.5***	1
37	LC521640	Bacteria;Proteobacteria;Gammaproteobacteria;Burkholderiales;Nitrosomonadaceae;Nitrosomonas;	Nitrosomonas sp. NP1 (LC126444.1)	99.5	6
38	LC521641	Bacteria;Proteobacteria;Gammaproteobacteria;Burkholderiales;Nitrosomonadaceae;Nitrosomonas;	Nitrosomonas sp. strain Nm86 (AY123798.1)	97	3
39	LC521642	Bacteria;Proteobacteria;Gammaproteobacteria;Burkholderiales;Nitrosomonadaceae;Nitrosomonas;	Nitrosomonas ureae strain Nm10 (CP013341.1)	98.4	1
40	LC521643	Bacteria;Proteobacteria;Alphaproteobacteria;Dongiales;Dongiaceae;Dongia;	Rhodospirillales bacterium WX36 (KC921187.1)	97.5	1
41	LC521644	Bacteria;Proteobacteria;Alphaproteobacteria;Sphingomonadales;Sphingomonadaceae;Sphingopyxis;	Sphingopyxis sp. IM-3 (KX085480.1)	98.8	1
42	LC521645	Bacteria;Proteobacteria;Gammaproteobacteria;Burkholderiales;Comamonadaceae;	Simplicispira sp. strain NY02 (MK108043.1)	97.8	1
43	LC521646	Bacteria;Proteobacteria;Gammaproteobacteria;Pseudomonadales;Moraxellaceae;	Moraxella osloensis strain SK2-16.4 (MN421033.1)	99.7	2
44	LC521647	Bacteria;Proteobacteria;Gammaproteobacteria;Xanthomonadales;Xanthomonadaceae;Pseudoxanthomonas;	Pseudoxanthomonas sp. N4 (KF713487.1)	99.2	8
*The number of the obtained 16S rRNA gene clones were divided by the total sequenced 87 clones.
** The identity to "Ca. Nitrospira nitrosa" is 99.6%.
*** The identity to "Ca. Nitrospira nitrosa" is 97.5%.
